# Supplementary material for: The vaginal and fecal microbiomes are related to pregnancy status in beef heifers
Source: PubMed Central journal article supplement (PMC6909518; doi:10.1186/s40104-019-0401-2), 2019-12-13

**A**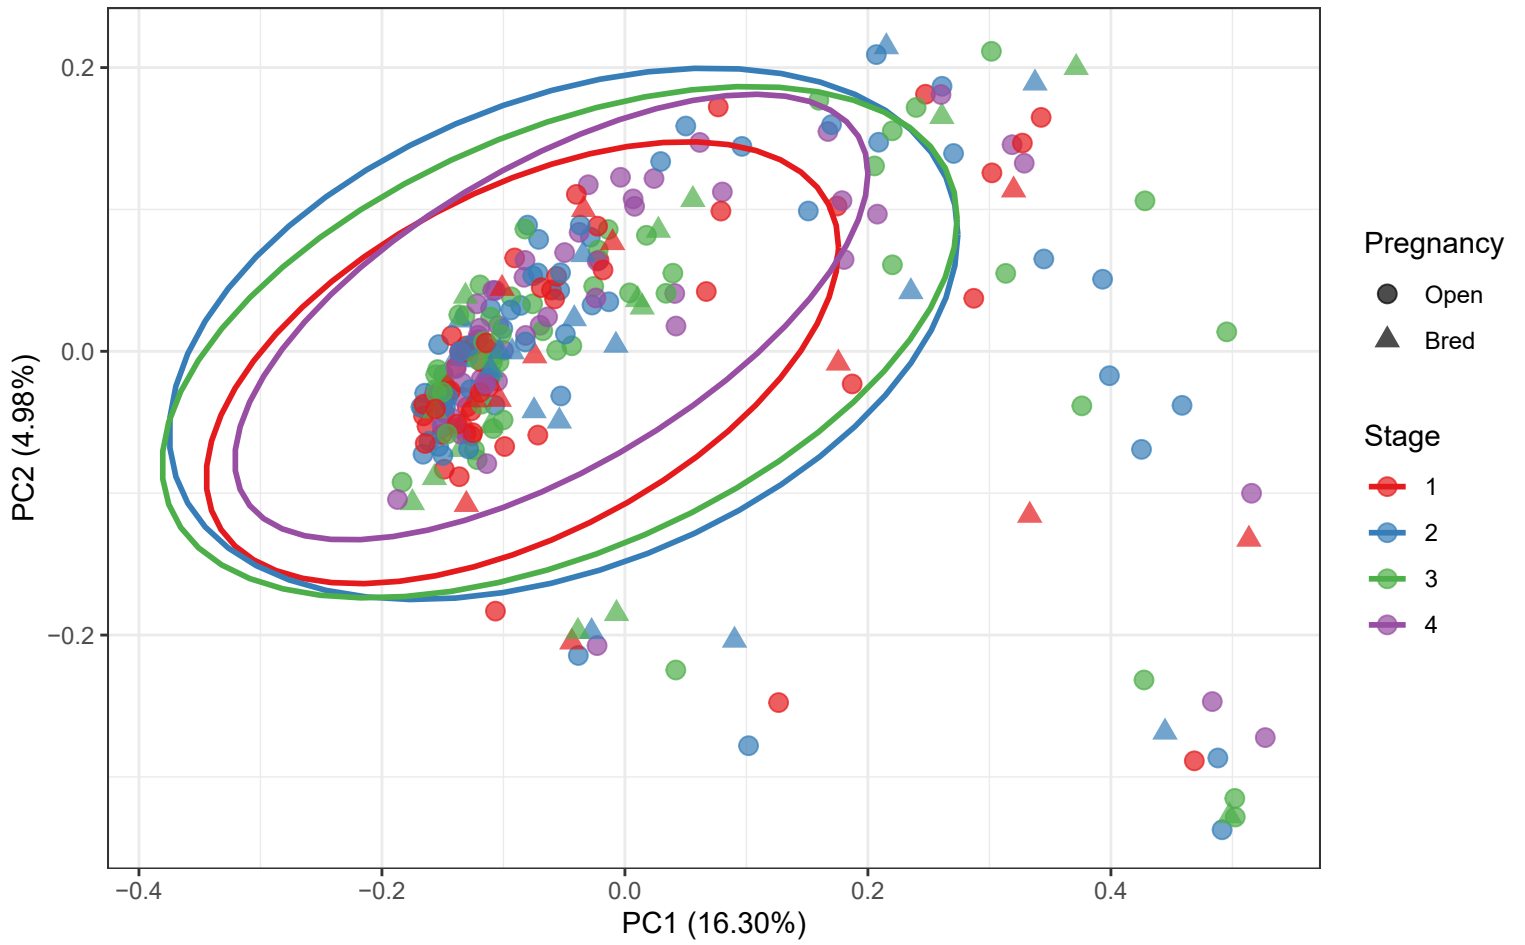**B**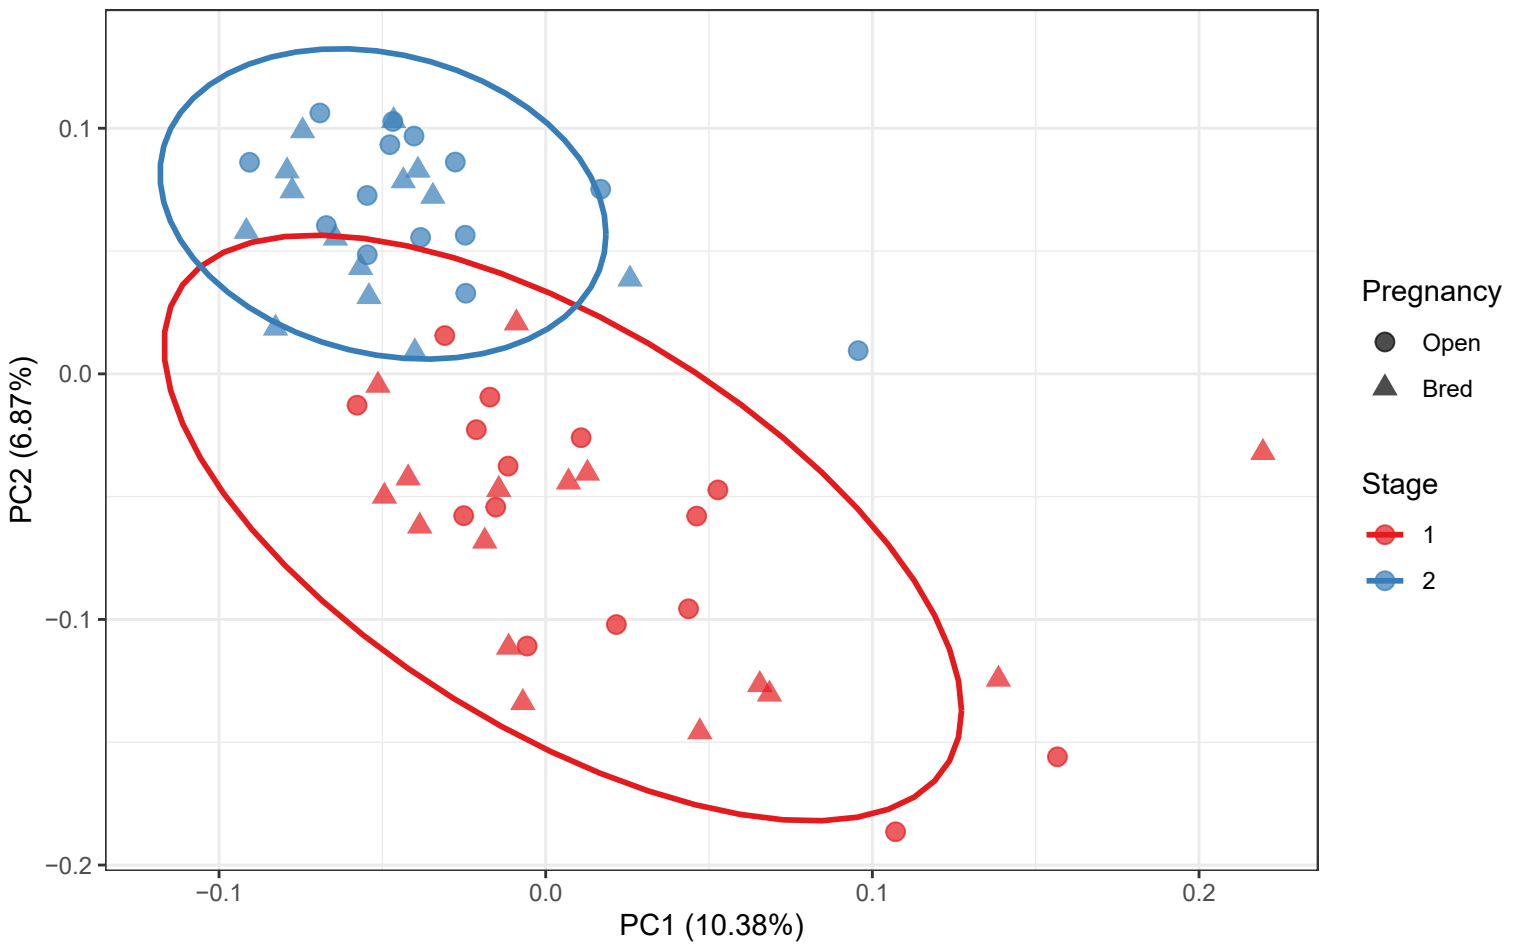

Supplement: 40104_2019_401_MOESM4_ESM.pdf [file 40104_2019_401_MOESM4_ESM.pdf]
