# Supplementary material for: The vaginal and fecal microbiomes are related to pregnancy status in beef heifers
Source: PubMed Central journal article supplement (PMC6909518; doi:10.1186/s40104-019-0401-2), 2019-12-13

Feature7 *Histophilus somni*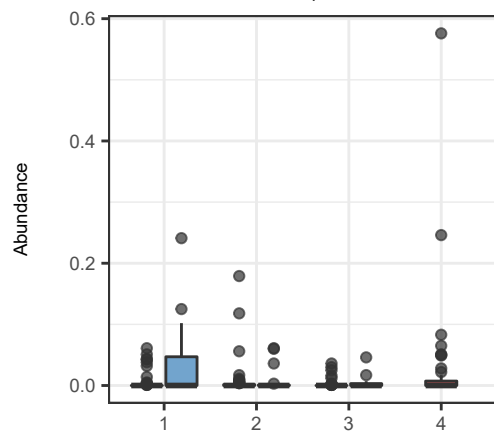Feature218 *Clostridiaceae* 02d06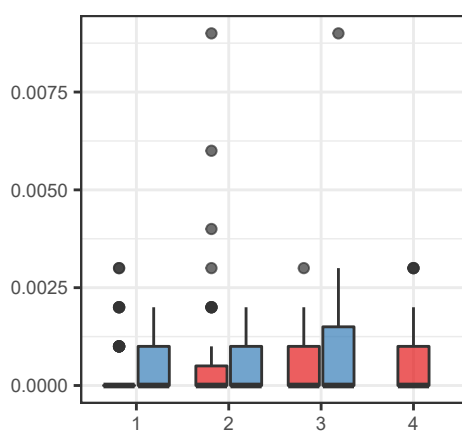Feature926 *Campylobacter*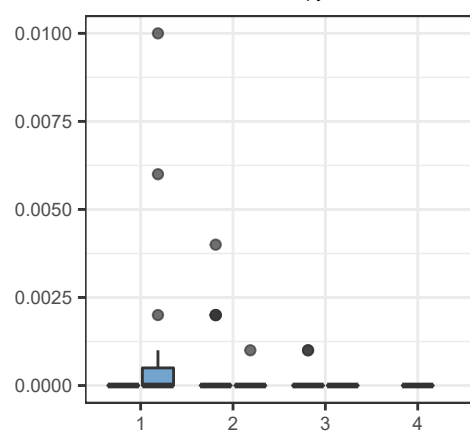Feature43 *Oscillospira*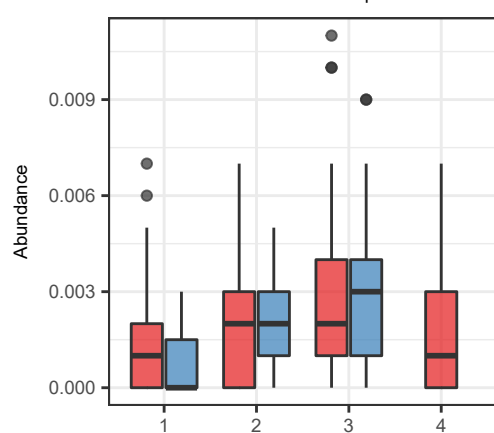Feature158 *Bacteroidaceae* 5.7N15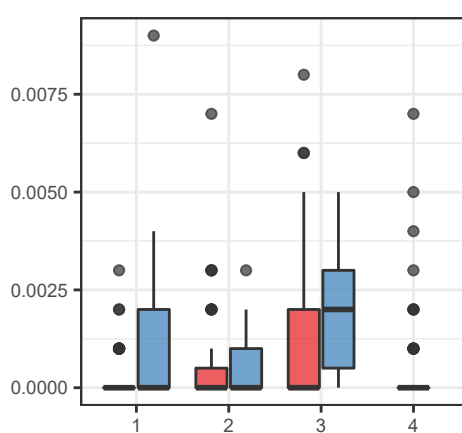Feature15 *Bacteroidaceae* 5.7N15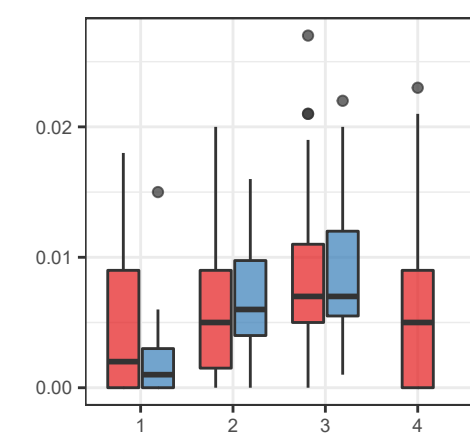Feature310 *Mogibacteriaceae*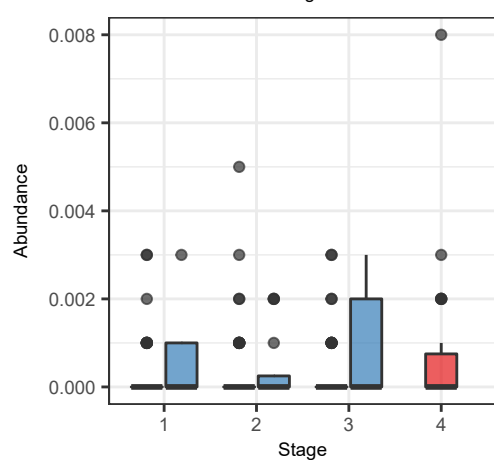Feature130 *Ruminococcaceae*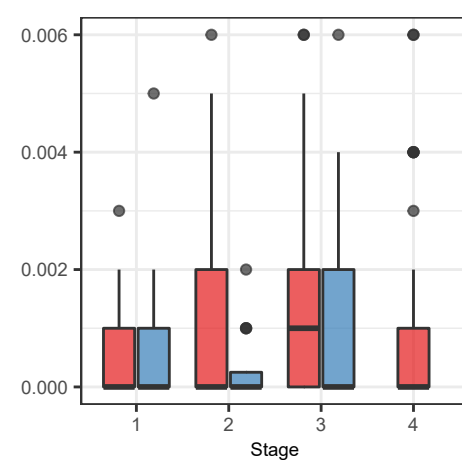Feature39 *Bacteroidaceae* 5.7N15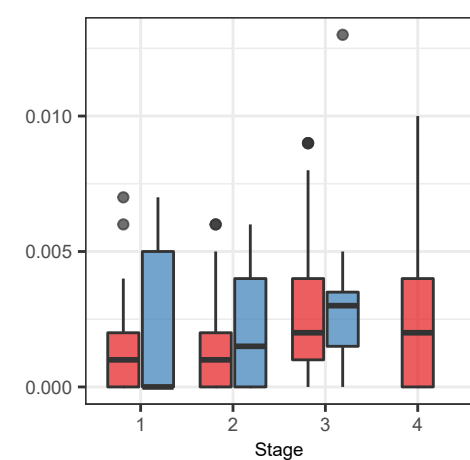

Supplement: 40104_2019_401_MOESM7_ESM.pdf [file 40104_2019_401_MOESM7_ESM.pdf]
