# Supplementary material for: The vaginal and fecal microbiomes are related to pregnancy status in beef heifers
Source: PubMed Central journal article supplement (PMC6909518; doi:10.1186/s40104-019-0401-2), 2019-12-13

Feature142 Bacteroidales

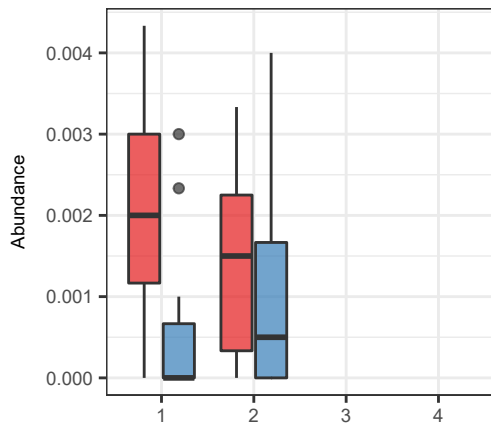

Feature123 Bacteroidales

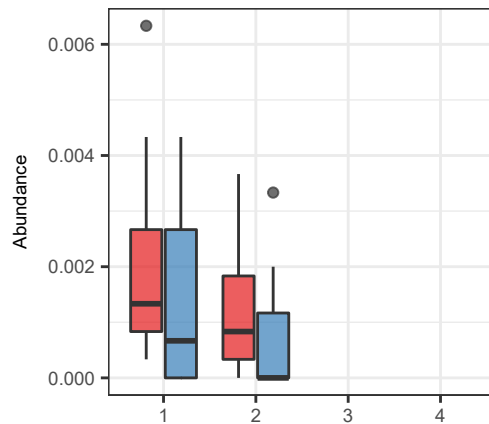

Feature175 Lachnospiraceae Dorea

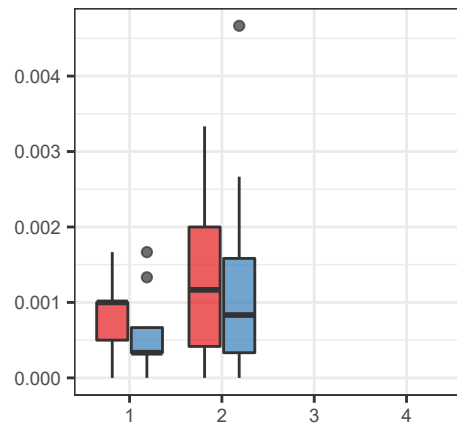

Feature17 Bacteroidaceae 5.7N15

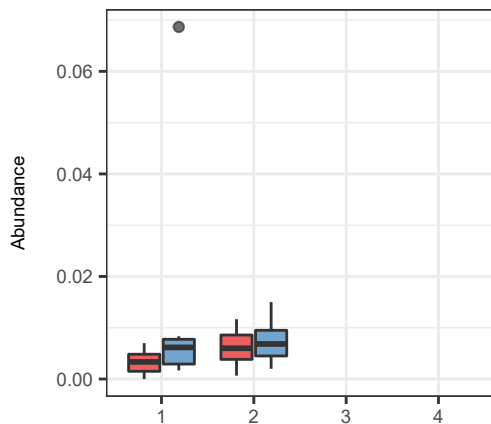

Feature79 Coriobacteriaceae

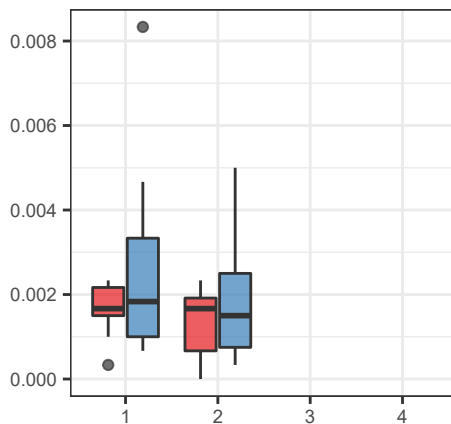

Feature1379 Mogibacteriaceae

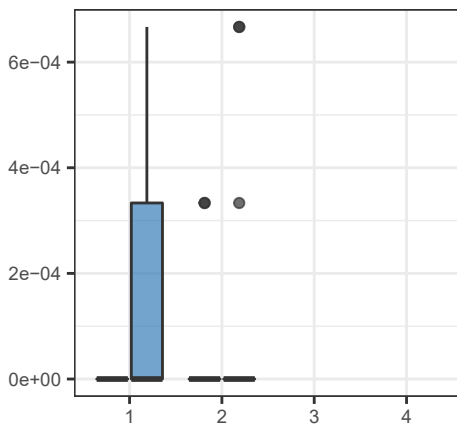

Feature598 Ruminococcaceae

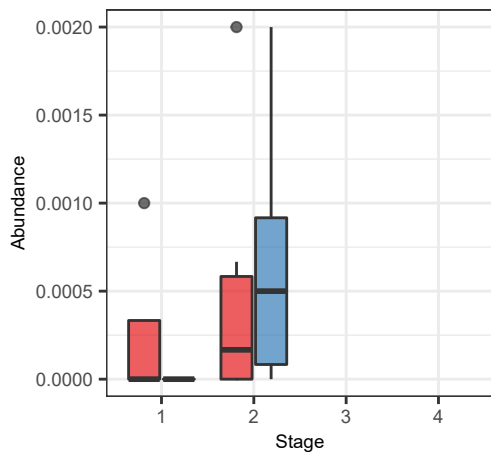

Feature1222 Synergistaceae Synergistes

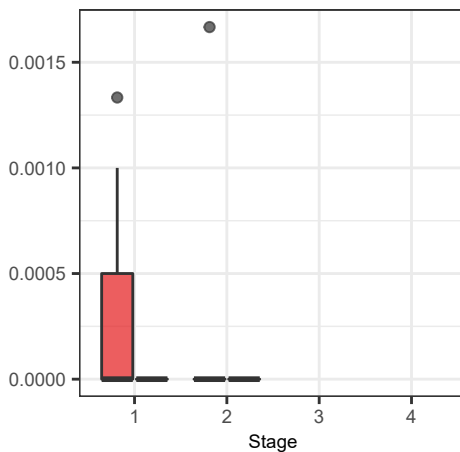

Feature3 Ruminococcaceae

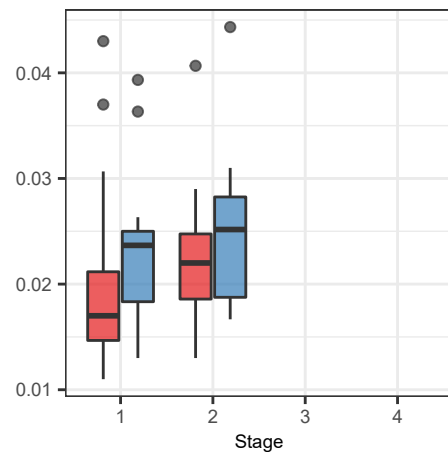

Supplement: 40104_2019_401_MOESM8_ESM.pdf [file 40104_2019_401_MOESM8_ESM.pdf]
